# Supplementary material for: Dynamic gene expression profiles during postnatal development of porcine subcutaneous adipose
Source: PeerJ journal article supplement (doi:10.7717/peerj.1768), 2016-03-10
Supplement: Fig_S1.pdf [file Fig_S1.pdf]

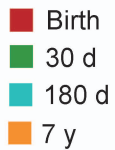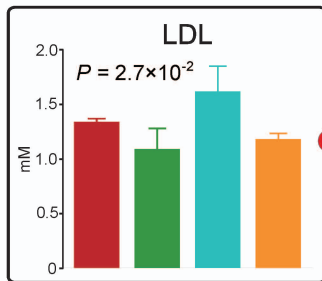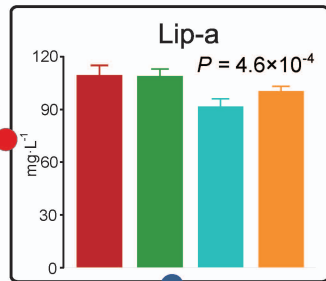

0.685\*

0.629\*

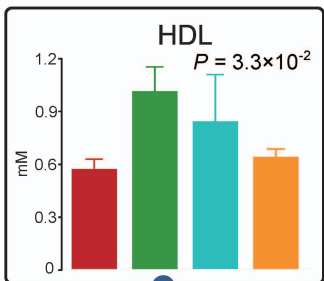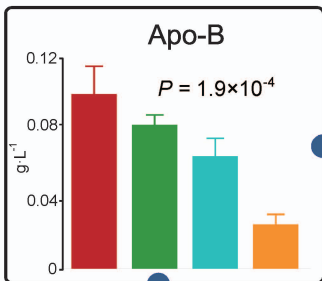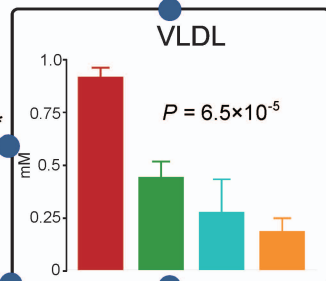

0.774\*\*

0.786\*\*

0.824\*\*\*

0.764\*\*

0.583\*

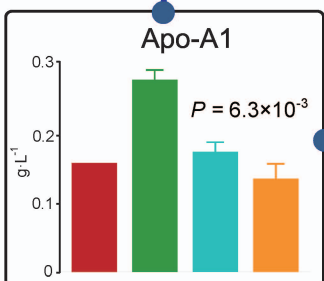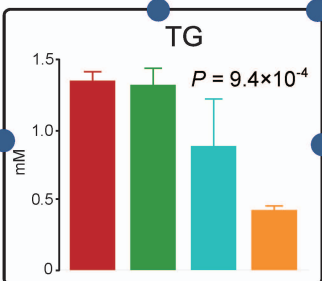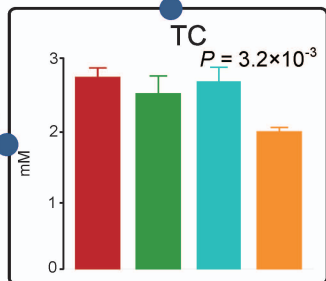

0.601\*

0.809\*\*
