# Supplementary material for: Dynamic gene expression profiles during postnatal development of porcine subcutaneous adipose
Source: PeerJ journal article supplement (doi:10.7717/peerj.1768), 2016-03-10

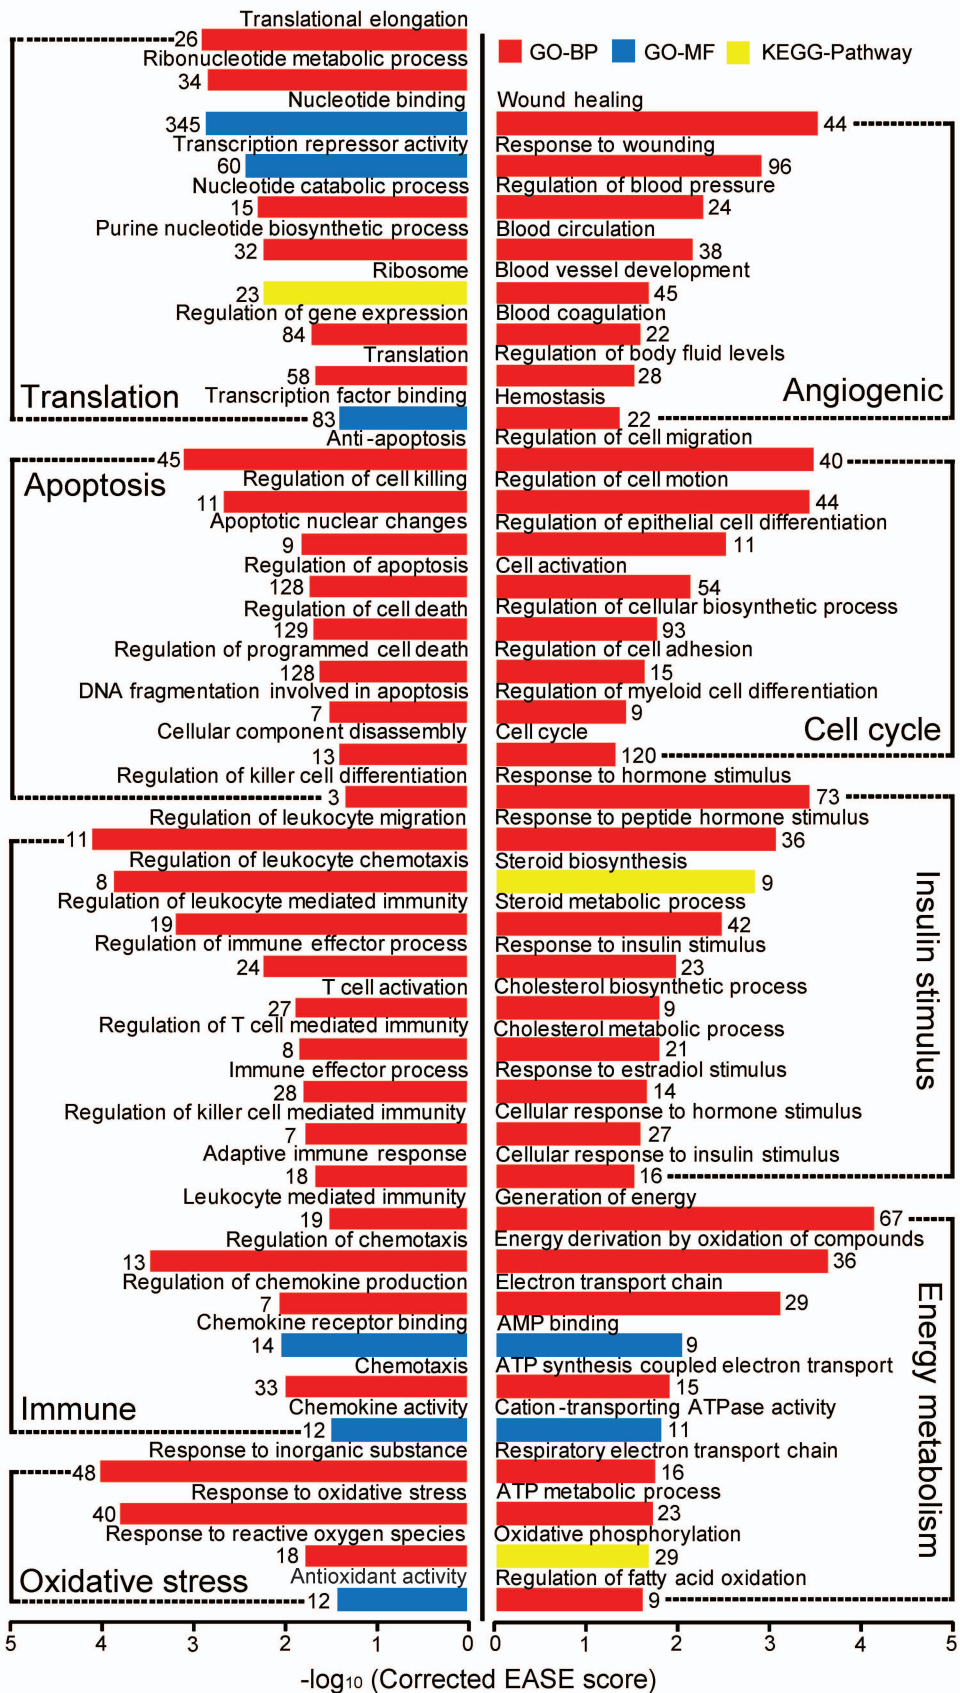

Supplement: Fig_S7.pdf [file Fig_S7.pdf]
