# Supplementary material for: Dynamic gene expression profiles during postnatal development of porcine subcutaneous adipose
Source: PeerJ. 2016 Mar 10;4:e1768. doi: 10.7717/peerj.1768 (PMC4793310; doi:10.7717/peerj.1768)
Supplement: Supplemental Information 1 — *: ACTB (β actin), TBP (TATA box binding protein), TOP2B (topoisomerase II β) and GCG (glucagon) are the endogenous control genes. a: Primer sequences used for mRNA q-PCR; b: Primer sequences used for mtDNA copy number q-PCR. [file peerj-04-1768-s001.xls]

## Sheet: Table S1
Table S1. Primer sequences used for Q-PCR
Gene symbol	Primer sequence (5’ to 3’)	Amplicon size(bp)	Ensembl ID
ACTB*a	F:TCTGGCACCACACCTTCT	114	ENSSSCG00000007585
	R:TGATCTGGGTCATCTTCTCAC
TBP*a	F:GATGGACGTTCGGTTTAGG	124	ENSSSCG00000022683
	R:AGCAGCACAGTACGAGCAA
TOP2B*a	F:AACTGGATGATGCTAATGATGCT	137	ENSSSCG00000011213
	R:TGGAAAAACTCCGTATCTGTCTC
GCG*b	F: GAATCAACACCATCGGTCAAAT	147	ENSSSCG00000015895
	R: CTCCACCCATAGAATGCCCAGT
TUBA1Ba	F: ACCTTAACCGCCTTATTAGCCA	288	ENSSSCG00000000190
	R: CACCACGGTACAACAGGCA
SCDa	F: GCCCCTCTACTTGGAAGACGA	161	ENSSSCG00000010554
	R: AAGTGATCCCATACAGGGCTC
COX1ab	F: ACTACTGACAGACCGCAACC	220	ENSSSCG00000018075
	R: TCCAATGGACATTATGGCTC
COX2a	F: TGAAGACGTCCTCCACTCATGA	64	ENSSSCG00000018078
	R: GCCTGGGATGGCATCAGTT
COX3a	F: CCTCCTCCAAGC	63	ENSSSCG00000018082
	R: CTCAGAATATT
ATP8a	F: GCCACAGTTAGATACATC	182	ENSSSCG00000018080
	R: GAGGTGAATAGATTTTCGTTC
CYTBa	F: TCTTCGCCTTTCACTTTATC	240	ENSSSCG00000018094
	R: GGGTGTAGTTGTCTGGGTCT
ND1ab	F: AGCCACATCCTCAATCTCC	205	ENSSSCG00000018065
	R: CCCGATGAGTGCGTATTTT
ND2a	F: GACTAAACCAAACCCAACT	189	ENSSSCG00000018069
	R: GGGATAGGGATAAAGTTGT
ND3a	F: CCTCCCTACTCGTACTAATCG	210	ENSSSCG00000018069
	R: GATTGTTTGTTTGGGATGCT
ND4a	F: ACGGACTCCATCTTTGACTG	217	ENSSSCG00000018069
	R: AGGTCGGTTTGACGTAAGC
ND5a	F: ATGTTGGTAGGCGGTGTATGA	230	ENSSSCG00000018069
	R: CTTCGCTGGCTTTATCATCTC
ATP6b	F: TATTTGCCTCTTTCATTGCCC	123	ENSSSCG00000018081
	R: GGATCGAGATTGTGCGGTTAT
